# Supplementary material for: MutSβ protects common fragile sites by facilitating homology-directed repair at DNA double-strand breaks with secondary structures
Source: PubMed Central journal article supplement — Nucleic Acids Res. 2023 Dec 1;52(3):1120–35. doi: 10.1093/nar/gkad1112 (PMC10853791; doi:10.1093/nar/gkad1112), 2023-12-01
Supplement: gkad1112_supplemental_file.pdf [file gkad1112_supplemental_file.pdf]

**A**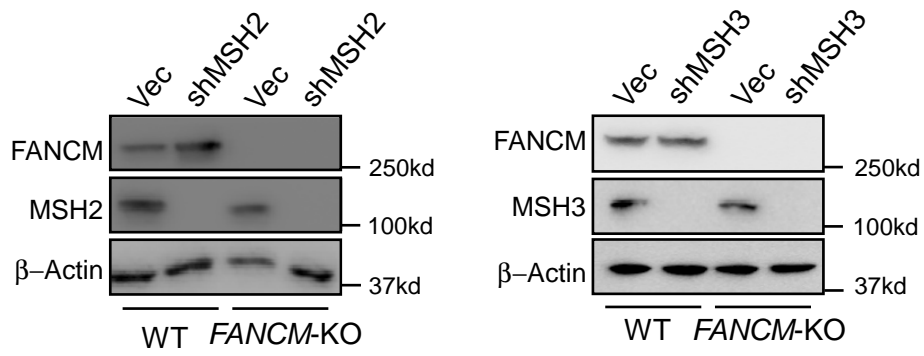**B**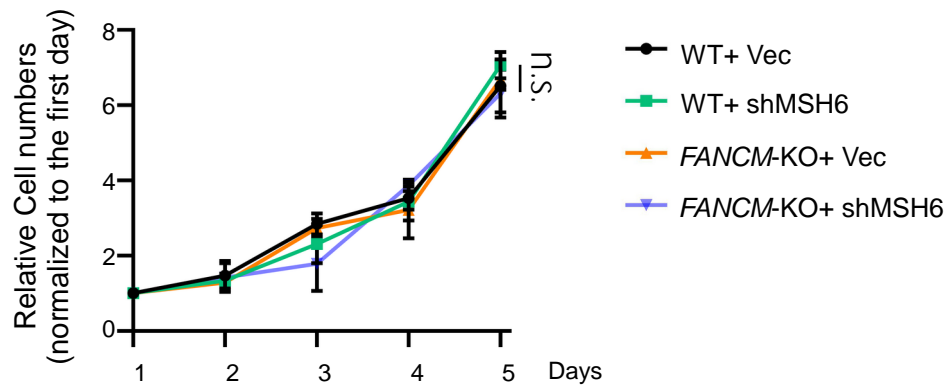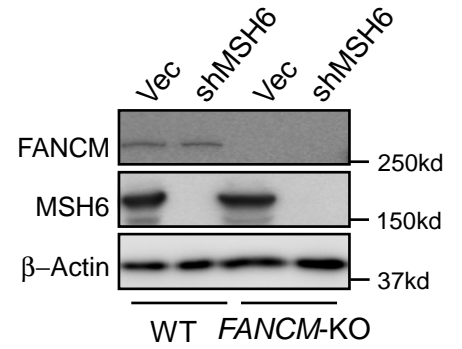**C**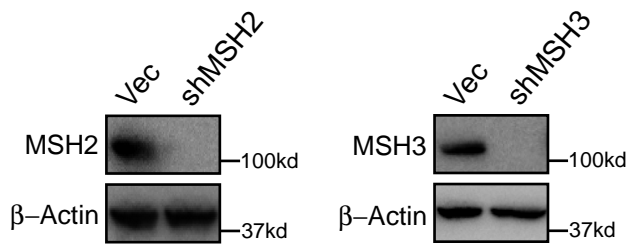

Figure S1

**Figure S1: MSH2/MSH3 is synthetically lethal with FANCM.**

(A). Depletion of MSH2 or MSH3 in WT and *FANCM*-KO HCT116 cells was confirmed by Western blot analysis. These cell lines were used in the experiments shown in Figure 1A.

(B). Growth curves (left panel) of HCT116 WT and *FANCM*-KO cells were plotted after infection with lentiviruses expressing MSH6 shRNA or a vector control (Vec). Error bars represent the standard deviation of three independent experiments. Depletion of MSH6 and *FANCM* KO in HCT116 cells were confirmed by Western blot analysis (right panel).

(C). Depletion of MSH2 or MSH3 in HCT116 cells was confirmed by Western blot analysis. These cell lines were used in the experiments shown in Figure 1C.

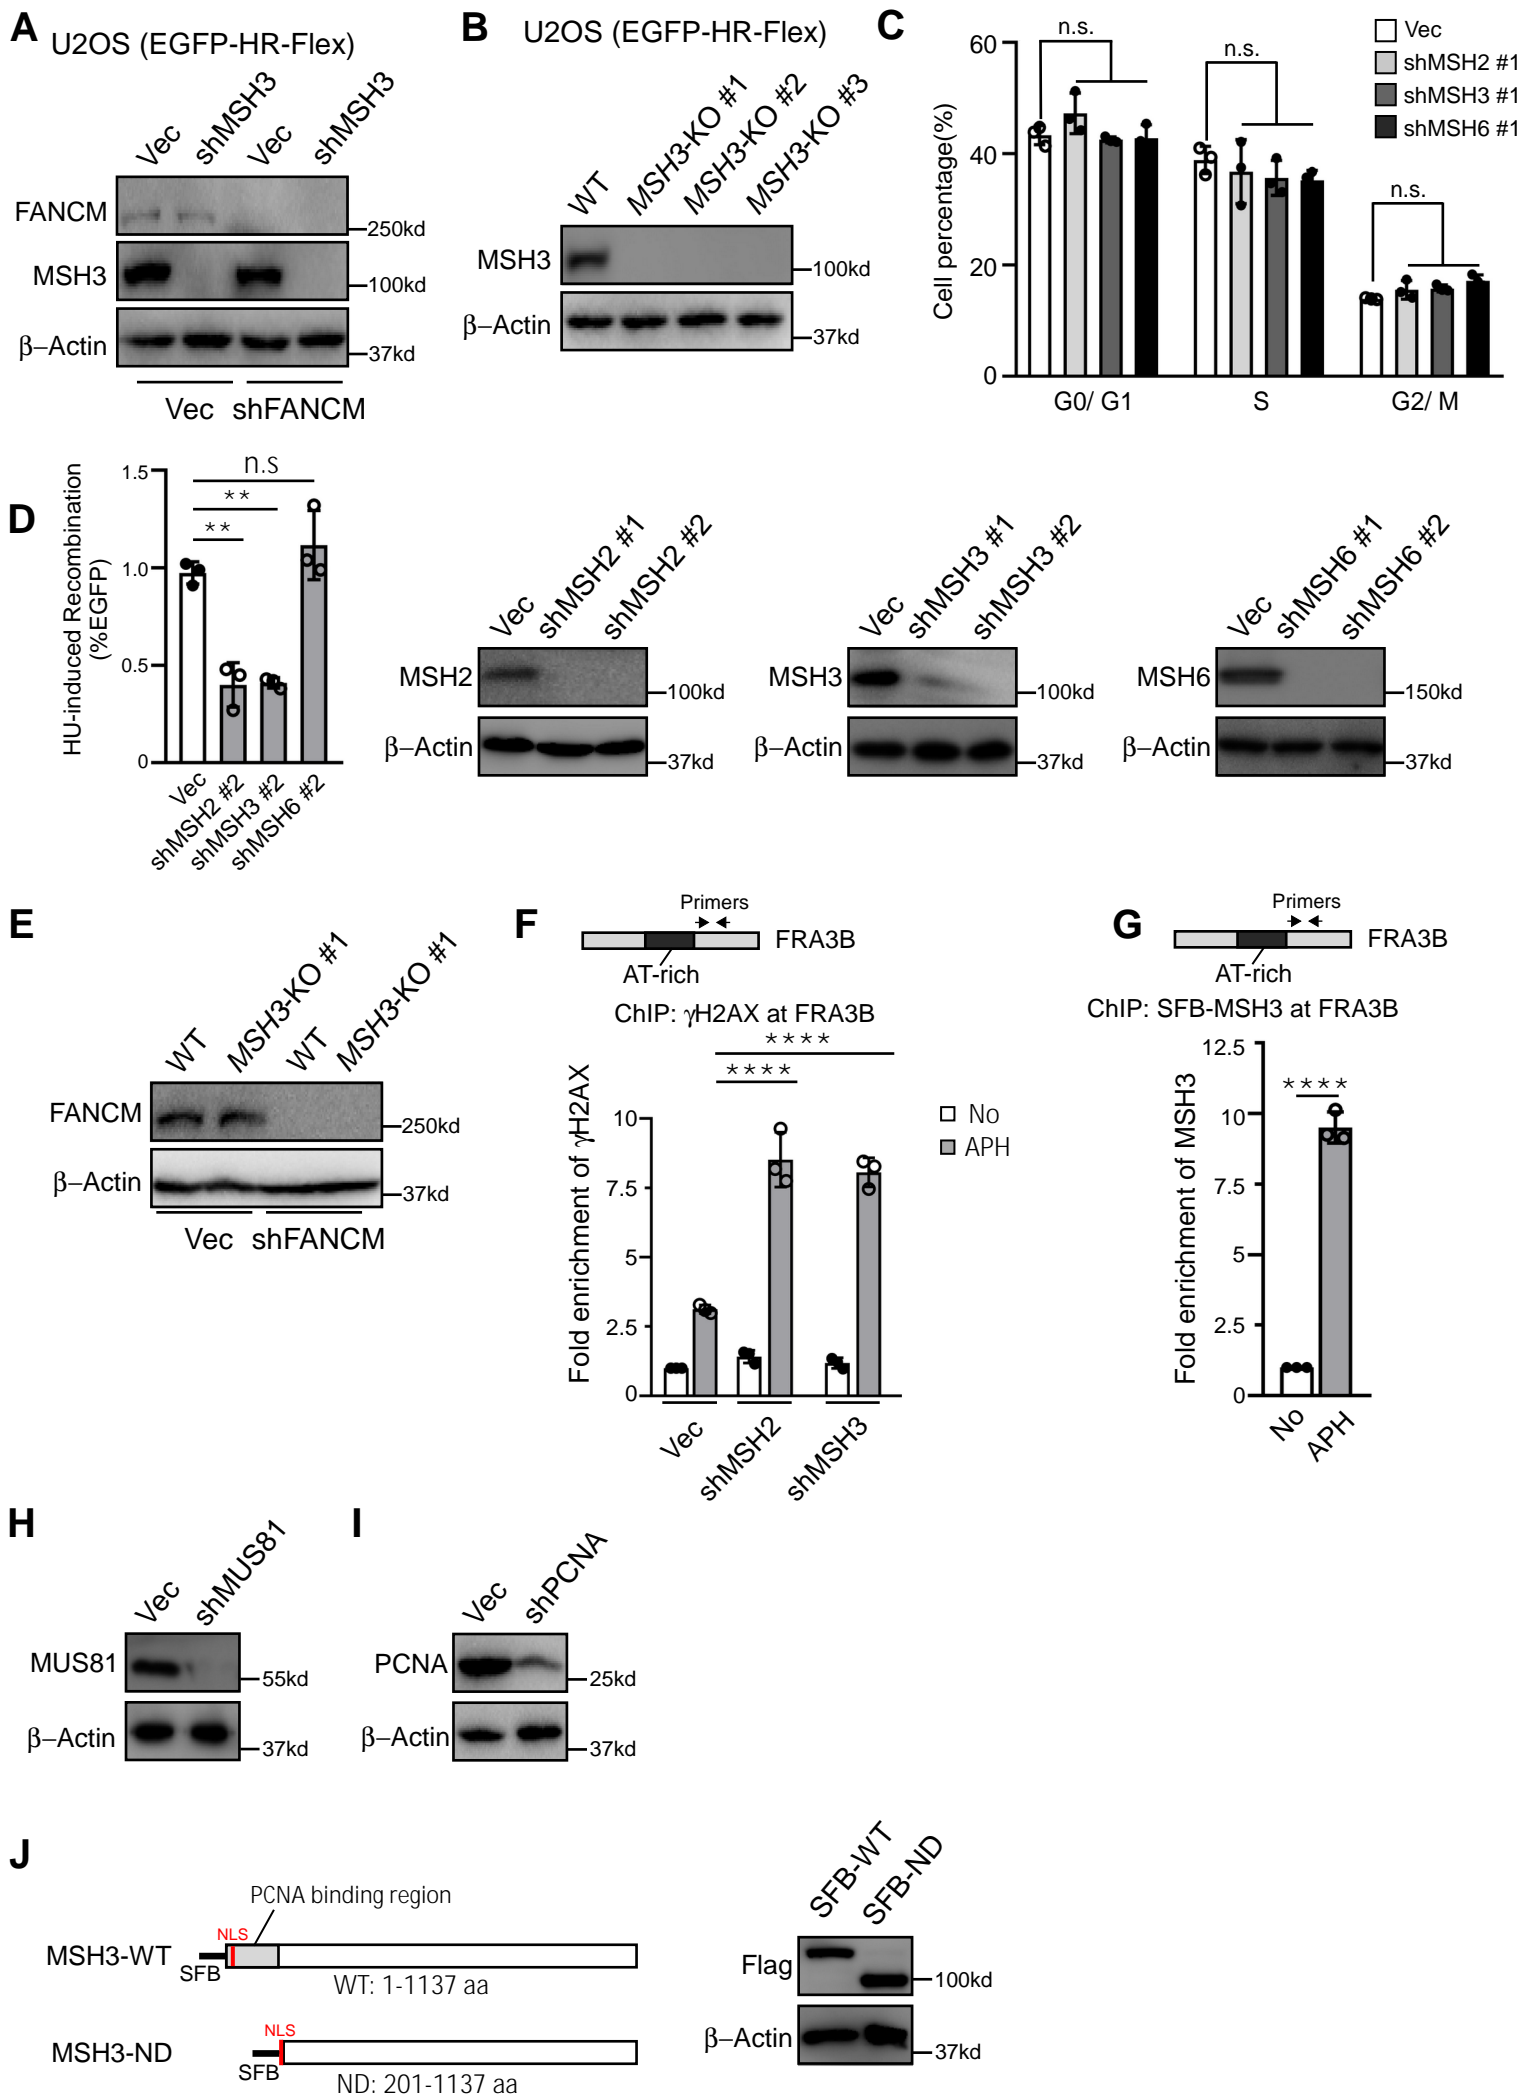

Figure S2

**Figure S2: MutS $\beta$  is required for mitotic recombination at Flex1.**

- (A). Western blot analysis was performed to confirm MSH3 and FANCM depletion with  $\beta$ -Actin as a loading control. These cell lines were used in the experiments shown in Figure 2B.
- (B). MSH3 was knocked out in U2OS (EGFP-HR-Flex) cells and three KO clones were subjected to MSH3 Western blot analysis. These cell lines were used in the experiments shown in Figure 2C.
- (C). Cell cycle analysis was performed in U2OS (EGFP-HR-Flex) cells after infection with lentiviruses expressing MSH2, MSH3, MSH6 shRNAs or a vector control (Vec). The proportion of cells in G0/G1 phase, S phase, G2/M phase as a percentage of the total number of cells is shown.
- (D). Western blot analysis was performed to confirm MSH2, MSH3, and MSH6 depletion with  $\beta$ -Actin as a loading control. These cell lines were used in the experiments shown in Figure 2D.
- (E). Western blot analysis was performed to confirm FANCM depletion in U2OS (EGFP-HR-Flex) WT and *MSH3*-KO cells with  $\beta$ -Actin as a loading control. These cell lines were used in the experiments shown in Figure 2E, right.
- (F). Anti- $\gamma$ H2AX ChIP analysis at FRA3B around AT-rich sequences was performed in HCT116 cells after depleting MSH2 or MSH3 with corresponding shRNA#1 or shRNA vector (Vec) and using indicated primer sets before and after APH treatment (0.8  $\mu$ M, 16 h). The ChIP value in HCT116 cells with no treatment in the Vec control sample was set as 1 for normalization.
- (G). Anti-streptavidin ChIP analysis at FRA3B around AT-rich sequences was performed in HCT116 cells expressing SFB-MSH3 before and after APH (0.8  $\mu$ M, 16 h) treatment. The ChIP value in the HCT116 cells with no treatment was set as 1 for normalization.
- (H, I). Western blot analysis was performed to confirm depletion of MUS81 (H) and PCNA (I) with  $\beta$ -Actin as a loading control. These cell lines were used in the experiments shown in Figure 2H and 2I.
- (J). A schematic drawing depicts SFB-MSH3 and SFB-MSH3-DN ( $\Delta$ 1-200aa) (left). The expression of SFB-MSH3-WT and SFB-MSH3-DN is shown by anti-Flag Western with  $\beta$ -Actin as a loading control (right). SFB: S protein-2xFlag-Streptavidin-Binding peptide tag, NLS: nuclear localization signal. ND: N-terminal deletion. These cell lines were used in the experiments shown in Figure 2J.

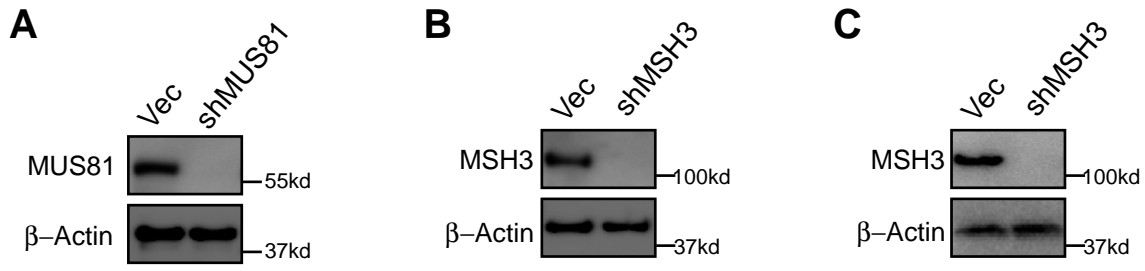

Figure S3

**Figure S3: MutS $\beta$  recruits RAD52 to Flex1 after DSB formation.**

Western blot analysis was performed to show MUS81 depletion in U2OS (EGFP-HR-Flex) cells expressing SFB-RAD52 (A), MSH3 depletion in U2OS cells (B) and MSH3 depletion in U2OS (EGFP-HR-Flex) cells expressing SFB-RAD52 (C) with  $\beta$ -Actin as a loading control. These cell lines were used in the experiments shown in Figure 3A-C.

**A**

EGFP-HR-Flex

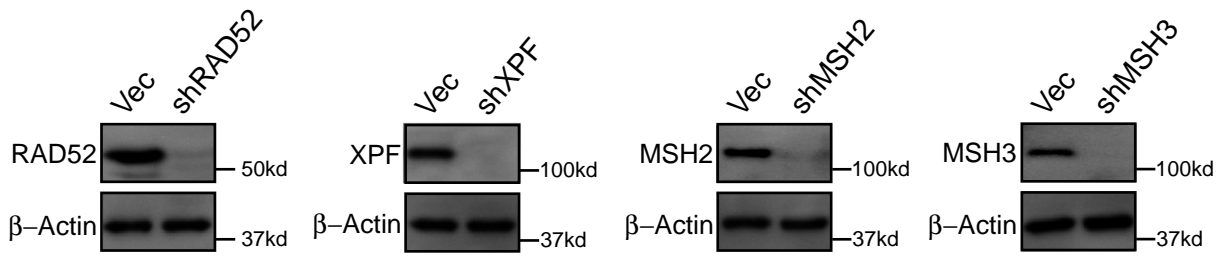**B**

EGFP-HR

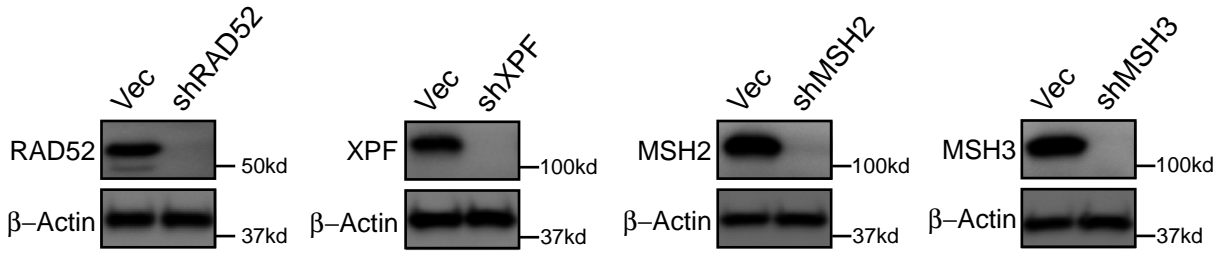**C**

EGFP-HR-Luc

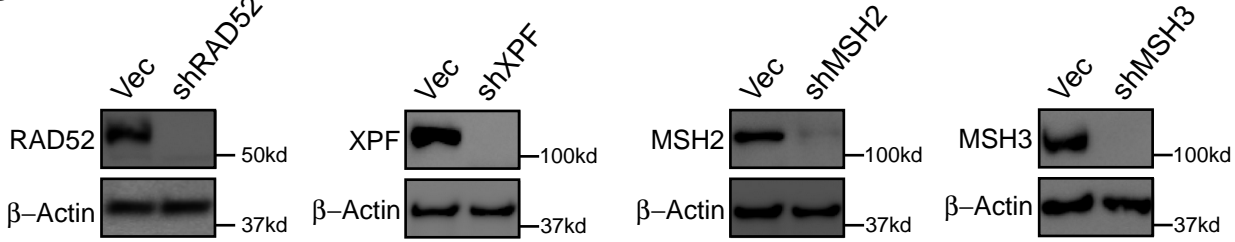**D**

HR-Flex/D-Flex

HR-Luc/D-Luc

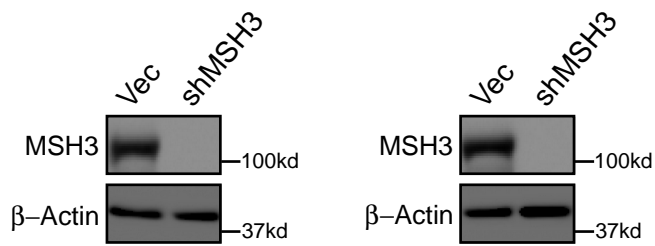

Figure S4

**Figure S4: MutS $\beta$  is important for removing Flex1 at DSBs to complete HR.**

(A-C). Western blot analysis was performed to confirm RAD52, XPF, MSH2 and MSH3 depletion in U2OS (EGFP-HR-Flex) cells (A), U2OS (EGFP-HR) cells (B) and U2OS (EGFP-HR-Luc) cells (C) with  $\beta$ -Actin as a loading control. These cell lines were used in the experiments shown in Figure 4A and 4B.

(D). Western blot analysis was performed to confirm MSH3 depletion in U2OS (HR-Flex/D-Flex) and U2OS (HR-Luc/D-Luc) with  $\beta$ -Actin as a loading control. These cell lines were used in the experiments shown in Figure 4C.



**A**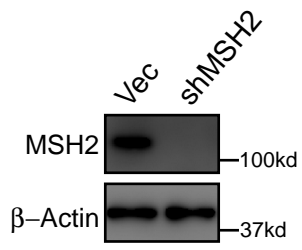**B**

U2OS (EGFP-Flex-BIR) cells

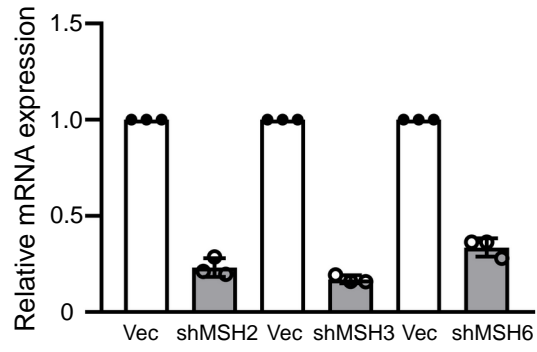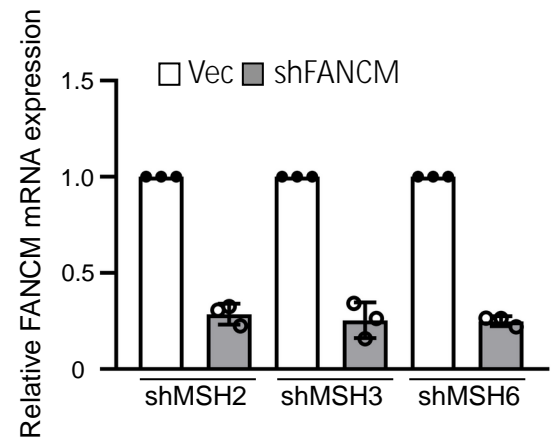**C**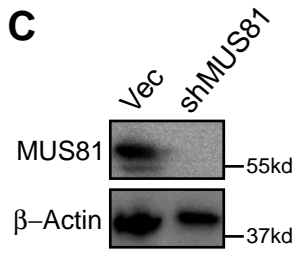**D**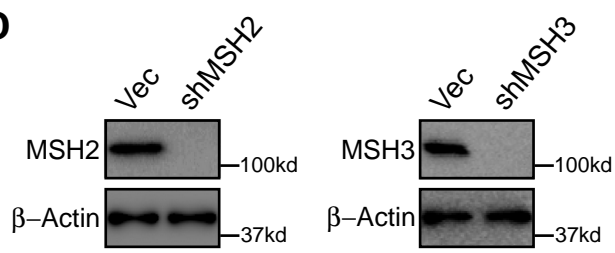

**Figure S5: MutS $\beta$  is important for MiDAS and preserving CFS stability.**

(A). Western blot analysis was performed to confirm MSH2 depletion in U2OS cells with  $\beta$ -Actin as a loading control. These cell lines were used in the experiments shown in Figure 6A.

(B). qPCR was performed to show depletion of MSH2, MSH3 and MSH6 by shRNAs followed by FANCM depletion in U2OS (EGFP-Flex-BIR) cells. These cell lines were used in the experiments shown in Figure 6B.

(C). Western blot analysis was performed to confirm MUS81 depletion in U2OS cells with  $\beta$ -Actin as a loading control. These cell lines were used in the experiments shown in Figure 6E.

(D). Western blot analysis was performed to confirm MSH2 and MSH3 depletion in HCT116 cells with  $\beta$ -Actin as a loading control.
